# Supplementary material for: Sc2S@C68: an obtuse di-scandium sulfide cluster trapped in a C2vfullerene cage
Source: Royal Society of Chemistry journal article supplement (doi:10.1039/c4cp01218f), 2014-01-01
Supplement: c4cp01218f1.pdf [file c4cp01218f1.pdf]

*Electronic Supplementary Information for*

**Sc<sub>2</sub>S@C<sub>68</sub>: an Obtuse Di-scandium Sulfide Cluster Trapped in a  
C<sub>2v</sub> Fullerene Cage**

**Yi-Jun Guo<sup>a,§</sup>, Bo-Chao Gao<sup>a,§</sup>, Tao Yang<sup>a</sup>, Shigeru Nagase<sup>b</sup>, and Xiang Zhao<sup>\*a</sup>**

*<sup>a</sup>Institute for Chemical Physics & Department of Chemistry, State Key Laboratory of  
Electrical Insulation and Power Equipment, Xi'an Jiaotong University, Xi'an 710049, China*

*Email: [xzhao@mail.xjtu.edu.cn](mailto:xzhao@mail.xjtu.edu.cn); Fax: +86 29 8266 8559; Tel: +86 29 8266 5671*

*<sup>b</sup>Fukui Institute for Fundamental Chemistry, Kyoto University, Kyoto 606-8103, Japan*

*<sup>§</sup> Yi-Jun Guo and Bo-Chao Gao contributed equally.*

**Contents**

- I. Fullerene anions screened at AM1 level.
- II. Fullerene anions further optimized at B3LYP/6-31G(d) level of theory.
- III. The first step of Sc<sub>2</sub>S@C<sub>68</sub> optimizations.
- IV. The second step of Sc<sub>2</sub>S@C<sub>68</sub> optimizations.
- V. Spin density of the oxidized and reduced Sc<sub>2</sub>S@C<sub>2v</sub>(6073)-C<sub>68</sub> ions.
- VI. Relationship between Sc-C bond lengths and Mayer bond orders.
- VII. A brief introduction to BCP indicators derived from Bader's QTAIM.
- VIII. Theoretical <sup>13</sup>C NMR chemical shifts of Sc<sub>2</sub>S@C<sub>2v</sub>(6073)-C<sub>68</sub>.
- IX. UV-vis-NIR absorption bands of Sc<sub>2</sub>S@C<sub>2v</sub>(6073)-C<sub>68</sub>.
- X. Cartesian coordinates of Sc<sub>2</sub>S@C<sub>2v</sub>(6073)-C<sub>68</sub>.

## I. Fullerene anions screened at AM1 level.

The total number of these isomers is 2636. Here we only provide the isomers with the relative energy less than 50 kcal/mol. For other results, please contact the corresponding author.

**Table S1.** C<sub>68</sub><sup>2-</sup> anions screened at AM1 level.

| Spiral Number | PA <sup>a</sup> | Symmetry   | Charge | Heat of Formation<br>(kcal/mol) | $\Delta H_f$ (kcal/mol) |
|---------------|-----------------|------------|--------|---------------------------------|-------------------------|
| 6094          | 2               | <i>Cs</i>  | -2     | 965.9964                        | 0.00                    |
| 6195          | 2               | <i>C2</i>  | -2     | 970.48287                       | 4.49                    |
| 6073          | 2               | <i>C2v</i> | -2     | 971.05931                       | 5.06                    |
| 6146          | 2               | <i>C2</i>  | -2     | 971.9478                        | 5.95                    |
| 6148          | 2               | <i>C1</i>  | -2     | 977.6262                        | 11.63                   |
| 6328          | 2               | <i>C2</i>  | -2     | 977.7805                        | 11.78                   |
| 6198          | 2               | <i>C1</i>  | -2     | 978.00023                       | 12.00                   |
| 6149          | 2               | <i>C2</i>  | -2     | 983.04311                       | 17.05                   |
| 6319          | 3               | <i>C1</i>  | -2     | 993.88645                       | 27.89                   |
| 6075          | 3               | <i>C1</i>  | -2     | 993.89096                       | 27.89                   |
| 6290          | 2               | <i>C2</i>  | -2     | 993.89676                       | 27.90                   |
| 6079          | 3               | <i>C1</i>  | -2     | 994.33275                       | 28.34                   |
| 6128          | 3               | <i>C1</i>  | -2     | 994.84979                       | 28.85                   |
| 6050          | 3               | <i>C1</i>  | -2     | 994.87345                       | 28.88                   |
| 6101          | 3               | <i>C1</i>  | -2     | 995.51938                       | 29.52                   |
| 6228          | 3               | <i>C1</i>  | -2     | 995.61919                       | 29.62                   |
| 6232          | 3               | <i>C1</i>  | -2     | 996.72809                       | 30.73                   |
| 6097          | 3               | <i>C1</i>  | -2     | 997.06569                       | 31.07                   |
| 5615          | 3               | <i>C1</i>  | -2     | 997.5574                        | 31.56                   |
| 6309          | 3               | <i>C1</i>  | -2     | 997.60492                       | 31.61                   |
| 6102          | 3               | <i>C1</i>  | -2     | 998.00878                       | 32.01                   |
| 6070          | 3               | <i>C1</i>  | -2     | 998.23924                       | 32.24                   |
| 6174          | 3               | <i>C1</i>  | -2     | 998.27718                       | 32.28                   |
| 5205          | 3               | <i>C1</i>  | -2     | 998.39174                       | 32.40                   |
| 6029          | 3               | <i>C1</i>  | -2     | 998.39409                       | 32.40                   |
| 6117          | 3               | <i>C1</i>  | -2     | 998.53105                       | 32.53                   |
| 6089          | 3               | <i>C2</i>  | -2     | 999.41318                       | 33.42                   |
| 6088          | 3               | <i>C1</i>  | -2     | 999.5321                        | 33.54                   |
| 6147          | 3               | <i>C1</i>  | -2     | 999.8039                        | 33.81                   |
| 6116          | 3               | <i>C1</i>  | -2     | 1000.12028                      | 34.12                   |
| 6193          | 3               | <i>C2</i>  | -2     | 1000.18379                      | 34.19                   |
| 6192          | 3               | <i>C1</i>  | -2     | 1000.52802                      | 34.53                   |
| 6201          | 3               | <i>C1</i>  | -2     | 1000.6714                       | 34.68                   |
| 6127          | 3               | <i>C1</i>  | -2     | 1001.54113                      | 35.54                   |
| 6270          | 2               | <i>C1</i>  | -2     | 1002.62879                      | 36.63                   |
| 6230          | 3               | <i>C1</i>  | -2     | 1002.77872                      | 36.78                   |

|      |   |           |    |            |       |
|------|---|-----------|----|------------|-------|
| 6160 | 3 | <i>CI</i> | -2 | 1002.92715 | 36.93 |
| 5596 | 3 | <i>CI</i> | -2 | 1003.12287 | 37.13 |
| 6138 | 3 | <i>CI</i> | -2 | 1003.14575 | 37.15 |
| 6072 | 3 | <i>Cs</i> | -2 | 1003.35255 | 37.36 |
| 6150 | 3 | <i>CI</i> | -2 | 1003.73711 | 37.74 |
| 6154 | 3 | <i>CI</i> | -2 | 1004.00199 | 38.01 |
| 4822 | 3 | <i>CI</i> | -2 | 1006.36071 | 40.36 |
| 6301 | 3 | <i>CI</i> | -2 | 1006.37676 | 40.38 |
| 6162 | 3 | <i>CI</i> | -2 | 1006.46141 | 40.47 |
| 6108 | 3 | <i>C2</i> | -2 | 1006.63581 | 40.64 |
| 6039 | 3 | <i>CI</i> | -2 | 1007.37497 | 41.38 |
| 4817 | 3 | <i>CI</i> | -2 | 1007.62514 | 41.63 |
| 6118 | 3 | <i>C2</i> | -2 | 1008.23685 | 42.24 |
| 6166 | 3 | <i>CI</i> | -2 | 1009.56518 | 43.57 |
| 6153 | 3 | <i>CI</i> | -2 | 1009.64506 | 43.65 |
| 6145 | 3 | <i>CI</i> | -2 | 1010.65071 | 44.65 |
| 3824 | 3 | <i>C2</i> | -2 | 1010.94983 | 44.95 |
| 5996 | 3 | <i>CI</i> | -2 | 1011.32401 | 45.33 |
| 6063 | 3 | <i>CI</i> | -2 | 1011.57198 | 45.58 |
| 6269 | 2 | <i>D2</i> | -2 | 1012.59562 | 46.60 |
| 6329 | 3 | <i>C3</i> | -2 | 1013.22613 | 47.23 |
| 6110 | 3 | <i>CI</i> | -2 | 1013.33994 | 47.34 |
| 6031 | 4 | <i>CI</i> | -2 | 1014.23708 | 48.24 |
| 6095 | 4 | <i>CI</i> | -2 | 1014.41077 | 48.41 |
| 6271 | 3 | <i>C2</i> | -2 | 1014.87344 | 48.88 |
| 6291 | 3 | <i>CI</i> | -2 | 1015.19032 | 49.19 |
| 6229 | 4 | <i>C2</i> | -2 | 1015.76129 | 49.76 |

<sup>a</sup> PA means the number of pentagon adjacencies.

**Table S2.** C<sub>68</sub><sup>4-</sup> anions screened at AM1 level.

| Spiral Number | Symmetry | Charge | PA <sup>a</sup> | Heat of Formation<br>(kcal/mol) | $\Delta H_f$<br>(kcal/mol) |
|---------------|----------|--------|-----------------|---------------------------------|----------------------------|
| 6073          | C2v      | -4     | 2               | 1120.3404                       | 0.00                       |
| 6140          | D3       | -4     | 3               | 1133.38459                      | 13.04                      |
| 6146          | C2       | -4     | 2               | 1134.85258                      | 14.51                      |
| 6118          | C2       | -4     | 3               | 1135.14825                      | 14.81                      |
| 6116          | C1       | -4     | 3               | 1136.90853                      | 16.57                      |
| 6039          | C1       | -4     | 3               | 1137.43507                      | 17.09                      |
| 6072          | Cs       | -4     | 3               | 1138.87345                      | 18.53                      |
| 6079          | C1       | -4     | 3               | 1139.80143                      | 19.46                      |
| 6094          | Cs       | -4     | 2               | 1139.86589                      | 19.53                      |
| 6102          | C1       | -4     | 3               | 1142.09362                      | 21.75                      |
| 6148          | C1       | -4     | 2               | 1142.11652                      | 21.78                      |
| 6101          | C1       | -4     | 3               | 1145.77171                      | 25.43                      |

|      |    |    |   |            |       |
|------|----|----|---|------------|-------|
| 6195 | C2 | -4 | 2 | 1148.17864 | 27.84 |
| 6138 | C1 | -4 | 3 | 1148.3464  | 28.01 |
| 6117 | C1 | -4 | 3 | 1148.41571 | 28.08 |
| 6075 | C1 | -4 | 3 | 1148.62572 | 28.29 |
| 6081 | Cs | -4 | 4 | 1148.83901 | 28.50 |
| 6070 | C1 | -4 | 3 | 1149.55781 | 29.22 |
| 6110 | C1 | -4 | 3 | 1150.53    | 30.19 |
| 6080 | C1 | -4 | 4 | 1150.7922  | 30.45 |
| 6128 | C1 | -4 | 3 | 1150.86921 | 30.53 |
| 6088 | C1 | -4 | 3 | 1151.71578 | 31.38 |
| 6309 | C1 | -4 | 3 | 1151.94135 | 31.60 |
| 5596 | C1 | -4 | 3 | 1152.34386 | 32.00 |
| 6089 | C2 | -4 | 3 | 1152.35467 | 32.01 |
| 6290 | C2 | -4 | 2 | 1152.78602 | 32.45 |
| 5615 | C1 | -4 | 3 | 1153.89894 | 33.56 |
| 6050 | C1 | -4 | 3 | 1154.06787 | 33.73 |
| 6099 | D2 | -4 | 4 | 1154.6557  | 34.32 |
| 6228 | C1 | -4 | 3 | 1155.24162 | 34.90 |
| 6149 | C2 | -4 | 2 | 1155.35634 | 35.02 |
| 6107 | C1 | -4 | 4 | 1156.47772 | 36.14 |
| 6328 | C2 | -4 | 2 | 1156.5543  | 36.21 |
| 6041 | C1 | -4 | 4 | 1156.91122 | 36.57 |
| 6198 | C1 | -4 | 2 | 1157.5441  | 37.20 |
| 5626 | Cs | -4 | 4 | 1157.61131 | 37.27 |
| 6104 | C1 | -4 | 4 | 1157.90589 | 37.57 |
| 6060 | C1 | -4 | 4 | 1158.85593 | 38.52 |
| 6127 | C1 | -4 | 3 | 1158.91526 | 38.57 |
| 6108 | C2 | -4 | 3 | 1159.63864 | 39.30 |
| 5087 | Cs | -4 | 4 | 1159.92541 | 39.59 |
| 6193 | C2 | -4 | 3 | 1160.04567 | 39.71 |
| 6147 | C1 | -4 | 3 | 1160.18742 | 39.85 |
| 6160 | C1 | -4 | 3 | 1160.52449 | 40.18 |
| 6112 | C1 | -4 | 4 | 1161.09993 | 40.76 |
| 6114 | C1 | -4 | 4 | 1161.18271 | 40.84 |
| 6229 | C2 | -4 | 4 | 1161.32226 | 40.98 |
| 6097 | C1 | -4 | 3 | 1161.39202 | 41.05 |
| 6318 | D2 | -4 | 4 | 1161.3962  | 41.06 |
| 6201 | C1 | -4 | 3 | 1161.72947 | 41.39 |
| 6095 | C1 | -4 | 4 | 1161.73467 | 41.39 |
| 6042 | C1 | -4 | 4 | 1162.52177 | 42.18 |
| 5996 | C1 | -4 | 3 | 1162.7314  | 42.39 |
| 6096 | C1 | -4 | 4 | 1162.87824 | 42.54 |
| 6043 | C1 | -4 | 4 | 1163.35819 | 43.02 |
| 6154 | C1 | -4 | 3 | 1163.54388 | 43.20 |

|      |    |    |   |            |       |
|------|----|----|---|------------|-------|
| 6085 | C1 | -4 | 4 | 1163.75598 | 43.42 |
| 4822 | C1 | -4 | 3 | 1164.27502 | 43.93 |
| 6113 | C1 | -4 | 4 | 1164.53516 | 44.19 |
| 6045 | C1 | -4 | 4 | 1164.57922 | 44.24 |
| 6037 | C1 | -4 | 4 | 1164.83796 | 44.50 |
| 6301 | C1 | -4 | 3 | 1164.95262 | 44.61 |
| 6129 | C1 | -4 | 4 | 1165.23132 | 44.89 |
| 6076 | C1 | -4 | 4 | 1165.30584 | 44.97 |
| 6029 | C1 | -4 | 3 | 1165.39365 | 45.05 |
| 6139 | C1 | -4 | 4 | 1165.60923 | 45.27 |
| 5602 | C1 | -4 | 4 | 1165.64797 | 45.31 |
| 6086 | C2 | -4 | 4 | 1165.92193 | 45.58 |
| 6093 | Cs | -4 | 4 | 1165.99532 | 45.65 |
| 5847 | C1 | -4 | 4 | 1166.23754 | 45.90 |
| 6231 | C1 | -4 | 4 | 1166.29027 | 45.95 |
| 6121 | C1 | -4 | 4 | 1166.99517 | 46.65 |
| 6145 | C1 | -4 | 3 | 1167.00875 | 46.67 |
| 5603 | C1 | -4 | 4 | 1167.08544 | 46.75 |
| 6063 | C1 | -4 | 3 | 1167.19094 | 46.85 |
| 6270 | C1 | -4 | 2 | 1167.1974  | 46.86 |
| 6087 | C1 | -4 | 4 | 1167.20384 | 46.86 |
| 5817 | C1 | -4 | 4 | 1167.29203 | 46.95 |
| 6162 | C1 | -4 | 3 | 1167.33881 | 47.00 |
| 6105 | C1 | -4 | 4 | 1167.76242 | 47.42 |
| 6038 | C2 | -4 | 4 | 1167.84954 | 47.51 |
| 6150 | C1 | -4 | 3 | 1167.94006 | 47.60 |
| 6122 | C1 | -4 | 4 | 1168.00232 | 47.66 |
| 5833 | C1 | -4 | 4 | 1168.09131 | 47.75 |
| 5587 | C1 | -4 | 4 | 1168.20421 | 47.86 |
| 6136 | D2 | -4 | 4 | 1168.47985 | 48.14 |
| 6040 | Cs | -4 | 4 | 1168.76372 | 48.42 |
| 5621 | C1 | -4 | 4 | 1168.84288 | 48.50 |
| 5644 | C1 | -4 | 4 | 1168.84696 | 48.51 |
| 6232 | C1 | -4 | 3 | 1168.98581 | 48.65 |
| 6271 | C2 | -4 | 3 | 1169.00976 | 48.67 |
| 6192 | C1 | -4 | 3 | 1169.02326 | 48.68 |
| 5278 | C1 | -4 | 4 | 1169.04077 | 48.70 |
| 6153 | C1 | -4 | 3 | 1169.10954 | 48.77 |
| 6044 | C1 | -4 | 4 | 1169.1544  | 48.81 |
| 6144 | C1 | -4 | 4 | 1169.16489 | 48.82 |
| 6174 | C1 | -4 | 3 | 1169.17748 | 48.84 |
| 6230 | C1 | -4 | 3 | 1169.30981 | 48.97 |
| 6078 | C1 | -4 | 4 | 1169.36235 | 49.02 |
| 5140 | C2 | -4 | 4 | 1169.69295 | 49.35 |

<sup>a</sup> PA means the number of pentagon adjacencies.

## II. Fullerene anions further optimized at B3LYP/6-31G(d) level of theory.

Those di- and tetra- anions of  $C_{68}$  isomers with their relative energy less than 40 kcal/mol at AM1 level of theory were further optimized by DFT calculation at B3LYP/6-31G(d) level.

**Table S3.** DFT optimizations of  $C_{68}^{2-}$  isomers.

| Spiral Number | Symmetry | Charge | PA | Relative Energy<br>(kcal/mol) | HOMO<br>(A.U.) | LUMO<br>(A.U.) | Gap<br>(eV) |
|---------------|----------|--------|----|-------------------------------|----------------|----------------|-------------|
| 6094          | Cs       | -2     | 2  | 0.0                           | 0.03209        | 0.10892        | 2.09        |
| 6073          | C2v      | -2     | 2  | 7.6                           | 0.03426        | 0.08725        | 1.44        |
| 6195          | C2       | -2     | 2  | 9.0                           | 0.03836        | 0.10746        | 1.88        |
| 6146          | C2       | -2     | 2  | 9.0                           | 0.03746        | 0.09514        | 1.57        |
| 6198          | C1       | -2     | 2  | 13.3                          | 0.04171        | 0.10951        | 1.84        |
| 6148          | C1       | -2     | 2  | 14.5                          | 0.04177        | 0.09742        | 1.51        |
| 6328          | C2       | -2     | 2  | 15.2                          | 0.05184        | 0.10624        | 1.48        |
| 6149          | C2       | -2     | 2  | 22.2                          | 0.04332        | 0.09747        | 1.47        |
| 6079          | C1       | -2     | 3  | 24.3                          | 0.03485        | 0.08583        | 1.39        |
| 6101          | C1       | -2     | 3  | 25.3                          | 0.03292        | 0.08836        | 1.51        |
| 6128          | C1       | -2     | 3  | 25.6                          | 0.03829        | 0.09259        | 1.48        |
| 6075          | C1       | -2     | 3  | 25.6                          | 0.03186        | 0.09034        | 1.59        |
| 6232          | C1       | -2     | 3  | 26.5                          | 0.03915        | 0.10537        | 1.80        |
| 6309          | C1       | -2     | 3  | 26.5                          | 0.04856        | 0.09302        | 1.21        |
| 6102          | C1       | -2     | 3  | 27.6                          | 0.03496        | 0.08490        | 1.36        |
| 6097          | C1       | -2     | 3  | 27.7                          | 0.03585        | 0.10077        | 1.77        |
| 6228          | C1       | -2     | 3  | 27.8                          | 0.04626        | 0.09326        | 1.28        |
| 6050          | C1       | -2     | 3  | 28.0                          | 0.03982        | 0.09499        | 1.50        |
| 6174          | C1       | -2     | 3  | 28.2                          | 0.03365        | 0.10331        | 1.90        |
| 6088          | C1       | -2     | 3  | 30.0                          | 0.03956        | 0.08868        | 1.34        |
| 6290          | C2       | -2     | 2  | 30.3                          | 0.06312        | 0.09336        | 0.82        |
| 6319          | C1       | -2     | 3  | 30.5                          | 0.04731        | 0.10573        | 1.59        |
| 6072          | Cs       | -2     | 3  | 30.7                          | 0.03131        | 0.08030        | 1.33        |
| 6160          | C1       | -2     | 3  | 31.5                          | 0.04159        | 0.09398        | 1.43        |
| 6070          | C1       | -2     | 3  | 31.6                          | 0.03794        | 0.08662        | 1.32        |
| 6089          | C2       | -2     | 3  | 31.9                          | 0.03843        | 0.08980        | 1.40        |
| 6201          | C1       | -2     | 3  | 32.0                          | 0.03862        | 0.09629        | 1.57        |
| 6192          | C1       | -2     | 3  | 32.4                          | 0.03552        | 0.09949        | 1.74        |
| 6116          | C1       | -2     | 3  | 32.5                          | 0.04274        | 0.07547        | 0.89        |
| 6118          | C2       | -2     | 3  | 32.6                          | 0.03940        | 0.07389        | 0.94        |

|      |    |    |   |      |         |         |      |
|------|----|----|---|------|---------|---------|------|
| 6147 | C1 | -2 | 3 | 32.9 | 0.03963 | 0.09478 | 1.50 |
| 6029 | C1 | -2 | 3 | 33.1 | 0.04051 | 0.09658 | 1.53 |
| 5205 | C1 | -2 | 3 | 33.4 | 0.04242 | 0.10744 | 1.77 |
| 6127 | C1 | -2 | 3 | 33.6 | 0.03834 | 0.09144 | 1.44 |
| 6193 | C2 | -2 | 3 | 33.6 | 0.03637 | 0.09269 | 1.53 |
| 6039 | C1 | -2 | 3 | 33.7 | 0.03499 | 0.07653 | 1.13 |
| 6117 | C1 | -2 | 3 | 33.8 | 0.04974 | 0.08310 | 0.91 |
| 5615 | C1 | -2 | 3 | 33.8 | 0.03833 | 0.09046 | 1.42 |
| 6230 | C1 | -2 | 3 | 34.0 | 0.04640 | 0.10099 | 1.49 |
| 6154 | C1 | -2 | 3 | 36.0 | 0.04303 | 0.09204 | 1.33 |
| 6138 | C1 | -2 | 3 | 36.3 | 0.04124 | 0.08231 | 1.12 |
| 6270 | C1 | -2 | 2 | 36.5 | 0.06056 | 0.09470 | 0.93 |
| 6150 | C1 | -2 | 3 | 37.3 | 0.04040 | 0.09575 | 1.51 |
| 6140 | D3 | -2 | 3 | 38.4 | 0.03734 | 0.06720 | 0.81 |
| 5596 | C1 | -2 | 3 | 41.1 | 0.03936 | 0.08224 | 1.17 |
| 6081 | Cs | -2 | 4 | 51.0 | 0.02959 | 0.06633 | 1.00 |

**Table S4.** DFT optimizations of  $C_{68}^{4+}$  isomers.

| Spiral Number | Symmetry   | Charge | PA | Relative Energy<br>(kcal/mol) | HOMO<br>(A.U.) | LUMO<br>(A.U.) | Gap<br>(eV) |
|---------------|------------|--------|----|-------------------------------|----------------|----------------|-------------|
| 6073          | <i>C2v</i> | -4     | 2  | 0.0                           | 0.27659        | 0.32199        | 1.24        |
| 6140          | <i>D3</i>  | -4     | 3  | 8.1                           | 0.26043        | 0.31417        | 1.46        |
| 6118          | <i>C2</i>  | -4     | 3  | 10.2                          | 0.26633        | 0.32311        | 1.55        |
| 6116          | <i>C1</i>  | -4     | 3  | 11.2                          | 0.26660        | 0.32991        | 1.72        |
| 6146          | <i>C2</i>  | -4     | 2  | 12.0                          | 0.28540        | 0.32383        | 1.05        |
| 6039          | <i>C1</i>  | -4     | 3  | 13.4                          | 0.26714        | 0.32856        | 1.67        |
| 6079          | <i>C1</i>  | -4     | 3  | 15.0                          | 0.27538        | 0.33138        | 1.52        |
| 6072          | <i>Cs</i>  | -4     | 3  | 16.0                          | 0.27225        | 0.32418        | 1.41        |
| 6102          | <i>C1</i>  | -4     | 3  | 17.0                          | 0.27417        | 0.31625        | 1.15        |
| 6081          | <i>Cs</i>  | -4     | 4  | 18.9                          | 0.25857        | 0.32132        | 1.71        |
| 6148          | <i>C1</i>  | -4     | 2  | 19.2                          | 0.28581        | 0.32595        | 1.09        |
| 6101          | <i>C1</i>  | -4     | 3  | 19.4                          | 0.27805        | 0.33038        | 1.42        |
| 6094          | <i>Cs</i>  | -4     | 2  | 20.1                          | 0.29891        | 0.32985        | 0.84        |
| 6080          | <i>C1</i>  | -4     | 4  | 21.0                          | 0.25531        | 0.32899        | 2.00        |
| 6117          | <i>C1</i>  | -4     | 3  | 21.9                          | 0.27385        | 0.32930        | 1.51        |
| 6075          | <i>C1</i>  | -4     | 3  | 22.6                          | 0.28062        | 0.32880        | 1.31        |
| 6138          | <i>C1</i>  | -4     | 3  | 22.9                          | 0.27201        | 0.31670        | 1.22        |
| 6070          | <i>C1</i>  | -4     | 3  | 24.1                          | 0.27718        | 0.32569        | 1.32        |
| 6110          | <i>C1</i>  | -4     | 3  | 25.0                          | 0.27247        | 0.31651        | 1.20        |
| 6128          | <i>C1</i>  | -4     | 3  | 25.0                          | 0.28216        | 0.32735        | 1.23        |
| 6088          | <i>C1</i>  | -4     | 3  | 25.4                          | 0.27969        | 0.32851        | 1.33        |
| 6309          | <i>C1</i>  | -4     | 3  | 25.9                          | 0.28190        | 0.33211        | 1.37        |
| 6195          | <i>C2</i>  | -4     | 2  | 26.3                          | 0.29590        | 0.32882        | 0.90        |
| 6107          | <i>C1</i>  | -4     | 4  | 26.9                          | 0.26178        | 0.32514        | 1.72        |

|      |           |    |   |      |         |         |      |
|------|-----------|----|---|------|---------|---------|------|
| 6099 | <i>D2</i> | -4 | 4 | 27.0 | 0.26252 | 0.32367 | 1.66 |
| 6104 | <i>C1</i> | -4 | 4 | 27.1 | 0.26941 | 0.32162 | 1.42 |
| 6089 | <i>C2</i> | -4 | 3 | 27.5 | 0.27870 | 0.31316 | 0.94 |
| 6041 | <i>C1</i> | -4 | 4 | 28.3 | 0.26773 | 0.31757 | 1.36 |
| 6149 | <i>C2</i> | -4 | 2 | 28.4 | 0.28835 | 0.32276 | 0.94 |
| 6290 | <i>C2</i> | -4 | 2 | 28.5 | 0.28052 | 0.32244 | 1.14 |
| 6228 | <i>C1</i> | -4 | 3 | 28.6 | 0.28358 | 0.33074 | 1.28 |
| 6050 | <i>C1</i> | -4 | 3 | 30.3 | 0.28436 | 0.32573 | 1.13 |
| 5615 | <i>C1</i> | -4 | 3 | 31.3 | 0.28117 | 0.32359 | 1.15 |
| 6328 | <i>C2</i> | -4 | 2 | 31.5 | 0.29548 | 0.33082 | 0.96 |
| 6127 | <i>C1</i> | -4 | 3 | 31.7 | 0.28122 | 0.32371 | 1.16 |
| 5626 | <i>Cs</i> | -4 | 4 | 32.3 | 0.26658 | 0.31746 | 1.38 |
| 6060 | <i>C1</i> | -4 | 4 | 32.5 | 0.27362 | 0.31807 | 1.21 |
| 6108 | <i>C2</i> | -4 | 3 | 33.0 | 0.27677 | 0.32635 | 1.35 |
| 6193 | <i>C2</i> | -4 | 3 | 33.0 | 0.28191 | 0.32354 | 1.13 |
| 5596 | <i>C1</i> | -4 | 3 | 34.2 | 0.27430 | 0.32491 | 1.38 |
| 6147 | <i>C1</i> | -4 | 3 | 34.6 | 0.28353 | 0.31736 | 0.92 |
| 6198 | <i>C1</i> | -4 | 2 | 34.7 | 0.29998 | 0.32677 | 0.73 |
| 5087 | <i>Cs</i> | -4 | 4 | 34.7 | 0.26985 | 0.32843 | 1.59 |

### III. The first step of $\text{Sc}_2\text{S}@C_{68}$ optimizations.

The number of formal electron transfer should be certain first because different numbers of formal charge transfer lead to different relative energy orders. Thus The optimization process of  $\text{Sc}_2\text{S}@C_{68}$  was divided into two steps. In the first step, 16 isomers were chosen to encapsulate  $\text{Sc}_2\text{S}$  cluster in terms of the Table S3 and S4 with +2 and +3 formal valence states of a Sc atom, respectively. When a Sc atom is in +3 formal valence state, it is obvious that each of them possess 18 electrons (closed-shell). Consequently, only spin-restricted algorithms were applied. As for +2 formal valence state of each Sc atoms, both of them have one unpaired electron. Those two electrons may be ferromagnetically coupled (triplet, high-spin state) and non-ferromagnetically coupled (singlet, low-spin state). When high-spin or low-spin states were deal, spin-unrestricted algorithms and spin-unrestricted-singlet algorithms with always mixing HOMO & LUMO were employed respectively. The results of first-step optimization of  $\text{Sc}_2@C_{68}$  isomers are listed in the Table S5. Clearly, either relative energies or HOMO/SOMO-LUMO gaps of ‘‘Closed-shell’’ and ‘‘Low-spin’’ state have no differences. As a result, those two states can be merged. Because relative energies of ‘‘Closed-shell’’ state are much lower than those of ‘‘High-spin’’ state, a formal four-electron transfer from intracluster to  $C_{68}$  cage seems reasonable.

**Table S5.** Relative energies and HOMO/SOMO-LUMO gaps of 16 isomers selected for the first step optimization.

| Spiral Number | Cage Symmetry | PA | Electronic State | Relative Energy (kcal/mol) | HOMO/SOMO (A.U.) | LUMO (A.U.) | Gap (eV) |
|---------------|---------------|----|------------------|----------------------------|------------------|-------------|----------|
| 6073          | <i>C2v</i>    | 2  | Low-spin         | 0.0                        | -0.18919         | -0.13280    | 1.53     |
| 6073          | <i>C2v</i>    | 2  | Closed-shell     | 0.0                        | -0.18919         | -0.13280    | 1.53     |



|      |            |   |              |      |          |          |      |
|------|------------|---|--------------|------|----------|----------|------|
| 6073 | <i>C2v</i> | 2 | High-spin    | 14.6 | -0.16733 | -0.15702 | 0.28 |
| 6146 | <i>C2</i>  | 2 | Low-spin     | 17.8 | -0.17533 | -0.12928 | 1.25 |
| 6146 | <i>C2</i>  | 2 | Closed-shell | 17.8 | -0.17533 | -0.12928 | 1.25 |
| 6140 | <i>D3</i>  | 3 | Low-spin     | 21.6 | -0.19438 | -0.14700 | 1.29 |
| 6140 | <i>D3</i>  | 3 | Closed-shell | 21.6 | -0.19438 | -0.14700 | 1.29 |
| 6039 | <i>C1</i>  | 3 | Low-spin     | 22.6 | -0.19340 | -0.13139 | 1.69 |
| 6039 | <i>C1</i>  | 3 | Closed-shell | 22.6 | -0.19339 | -0.13140 | 1.69 |
| 6079 | <i>C1</i>  | 3 | Low-spin     | 23.0 | -0.18873 | -0.12544 | 1.72 |
| 6079 | <i>C1</i>  | 3 | Closed-shell | 23.0 | -0.18873 | -0.12544 | 1.72 |
| 6116 | <i>C1</i>  | 3 | Low-spin     | 23.8 | -0.18090 | -0.12922 | 1.41 |
| 6116 | <i>C1</i>  | 3 | Closed-shell | 23.8 | -0.18090 | -0.12922 | 1.41 |
| 6118 | <i>C2</i>  | 3 | Closed-shell | 25.3 | -0.18147 | -0.13977 | 1.13 |
| 6118 | <i>C2</i>  | 3 | Low-spin     | 25.3 | -0.18147 | -0.13977 | 1.13 |
| 6148 | <i>C1</i>  | 2 | Low-spin     | 25.3 | -0.16868 | -0.12878 | 1.09 |
| 6148 | <i>C1</i>  | 2 | Closed-shell | 25.3 | -0.16868 | -0.12879 | 1.09 |
| 6146 | <i>C2</i>  | 2 | High-spin    | 25.7 | -0.16351 | -0.14277 | 0.56 |
| 6102 | <i>C1</i>  | 3 | Low-spin     | 28.7 | -0.18472 | -0.14115 | 1.19 |
| 6102 | <i>C1</i>  | 3 | Closed-shell | 28.7 | -0.18472 | -0.14115 | 1.19 |
| 6140 | <i>D3</i>  | 3 | High-spin    | 29.2 | -0.18096 | -0.15725 | 0.65 |
| 6094 | <i>Cs</i>  | 2 | Low-spin     | 29.6 | -0.16976 | -0.11559 | 1.47 |
| 6094 | <i>Cs</i>  | 2 | Closed-shell | 29.6 | -0.16976 | -0.11559 | 1.47 |
| 6148 | <i>C1</i>  | 2 | High-spin    | 29.7 | -0.16210 | -0.13616 | 0.71 |
| 6118 | <i>C2</i>  | 3 | High-spin    | 30.9 | -0.17131 | -0.14772 | 0.64 |
| 6072 | <i>Cs</i>  | 3 | Low-spin     | 31.1 | -0.18440 | -0.13710 | 1.29 |
| 6072 | <i>Cs</i>  | 3 | Closed-shell | 31.1 | -0.18440 | -0.13710 | 1.29 |
| 6101 | <i>C1</i>  | 3 | Low-spin     | 31.3 | -0.17757 | -0.12602 | 1.40 |
| 6101 | <i>C1</i>  | 3 | Closed-shell | 31.3 | -0.17757 | -0.12602 | 1.40 |
| 6195 | <i>C2</i>  | 2 | Low-spin     | 31.6 | -0.16475 | -0.12853 | 0.99 |
| 6195 | <i>C2</i>  | 2 | Closed-shell | 31.6 | -0.16475 | -0.12853 | 0.99 |
| 6195 | <i>C2</i>  | 2 | High-spin    | 32.6 | -0.16208 | -0.12863 | 0.91 |
| 6116 | <i>C1</i>  | 3 | High-spin    | 34.2 | -0.16363 | -0.14512 | 0.50 |
| 6102 | <i>C1</i>  | 3 | High-spin    | 35.6 | -0.17344 | -0.15140 | 0.60 |
| 6081 | <i>Cs</i>  | 4 | Closed-shell | 39.2 | -0.19195 | -0.14338 | 1.32 |
| 6081 | <i>Cs</i>  | 4 | Low-spin     | 39.3 | -0.19199 | -0.14331 | 1.32 |
| 6072 | <i>Cs</i>  | 3 | High-spin    | 40.0 | -0.16972 | -0.15044 | 0.52 |
| 6039 | <i>C1</i>  | 3 | High-spin    | 40.0 | -0.16517 | -0.15744 | 0.21 |
| 6079 | <i>C1</i>  | 3 | High-spin    | 42.1 | -0.15953 | -0.15643 | 0.08 |
| 6094 | <i>Cs</i>  | 2 | High-spin    | 42.2 | -0.15045 | -0.13552 | 0.41 |
| 6101 | <i>C1</i>  | 3 | High-spin    | 43.1 | -0.15890 | -0.14528 | 0.37 |
| 6198 | <i>C1</i>  | 2 | Closed-shell | 46.4 | -0.17048 | -0.13071 | 1.08 |
| 6198 | <i>C1</i>  | 2 | Low-spin     | 46.4 | -0.17051 | -0.13070 | 1.08 |
| 6198 | <i>C1</i>  | 2 | High-spin    | 48.1 | -0.16753 | -0.13555 | 0.87 |
| 6081 | <i>Cs</i>  | 4 | High-spin    | 49.2 | -0.17374 | -0.15711 | 0.45 |
| 6328 | <i>C2</i>  | 2 | Closed-shell | 50.2 | -0.17572 | -0.12826 | 1.29 |

|      |    |   |           |      |          |          |      |
|------|----|---|-----------|------|----------|----------|------|
| 6328 | C2 | 2 | Low-spin  | 50.2 | -0.17571 | -0.12825 | 1.29 |
| 6328 | C2 | 2 | High-spin | 59.9 | -0.16261 | -0.13992 | 0.62 |

#### IV. The second step of $\text{Sc}_2\text{S}@C_{68}$ optimization.

In this step, at least three more arrangements of a sulfide cluster in the carbon cages with top-six lowest relative energies were considered. Because we have unambiguously confirmed that “Low-spin” and “Closed-shell” states of each isomers are the same, and “High-spin” state of each isomers is less-stable, only “Closed-shell” state was taken into account in this part. The initial and optimized structures of them are depicted in the Figure S1 to Figure S6 respectively with relative energies.

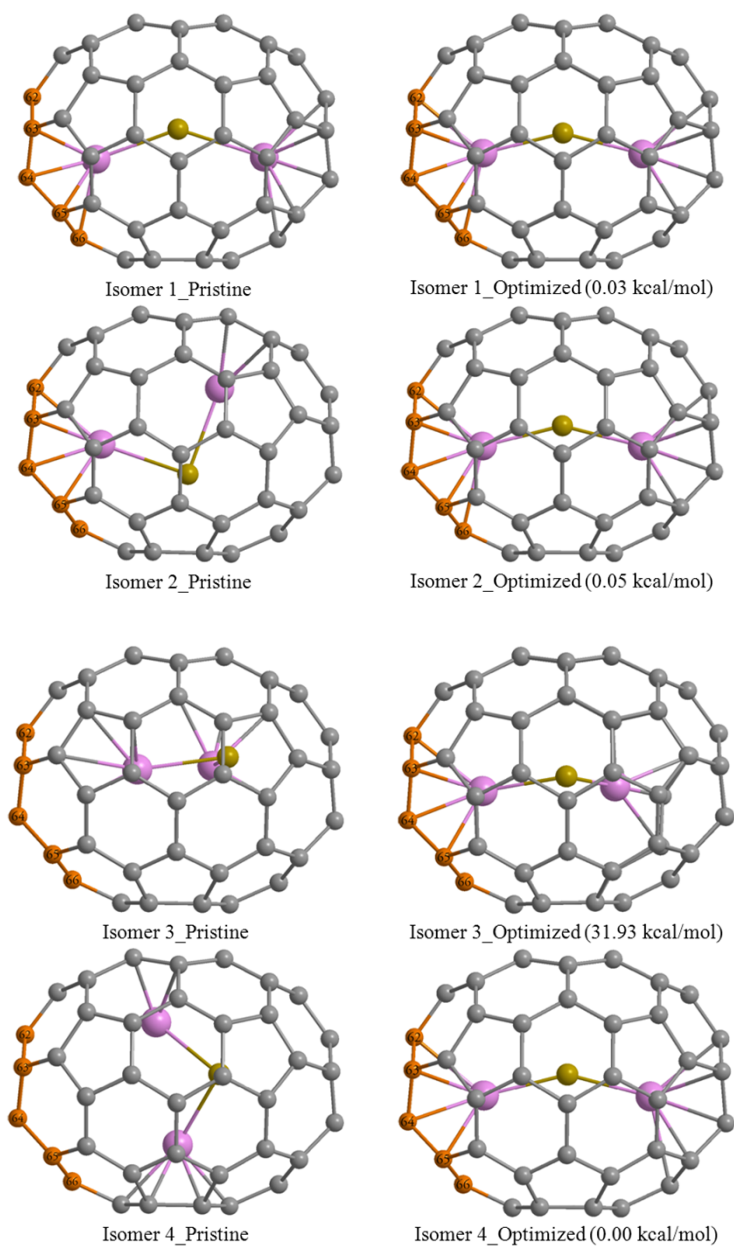

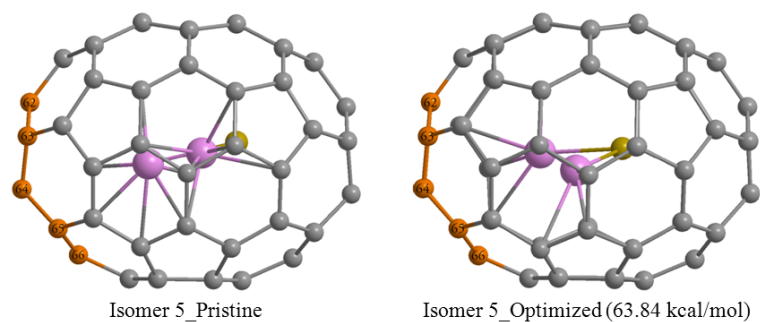

**Figure S1.**  $C_{2v}(6073)$ - $C_{68}$  based isomers.

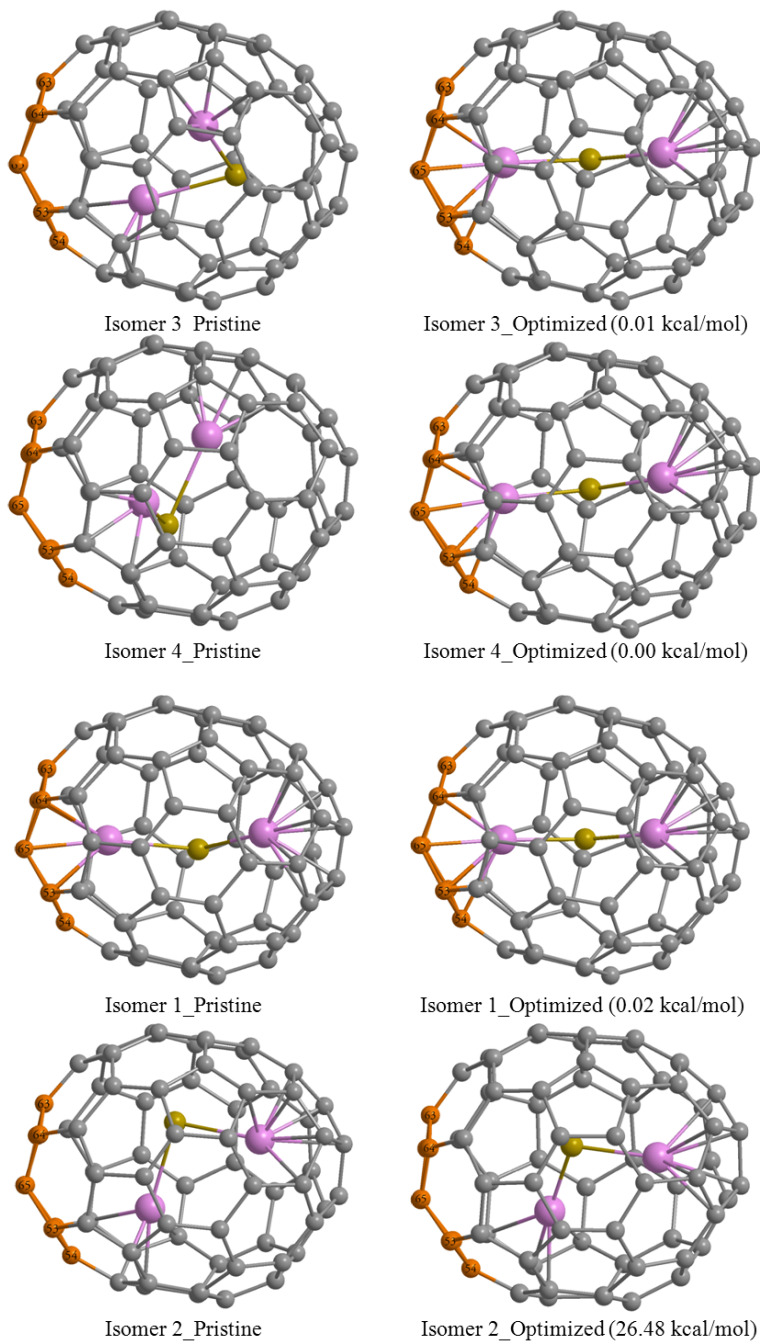

**Figure S2.**  $C_2(6146)$ - $C_{68}$  based isomers.

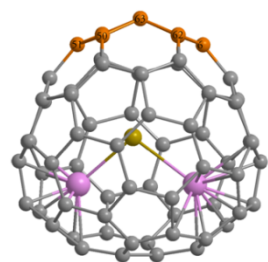

Isomer\_1\_Pristine

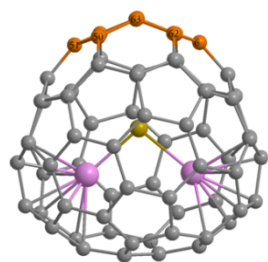

Isomer\_1\_Optimized (0.00 kcal/mol)

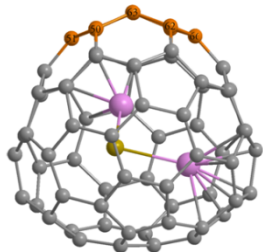

Isomer\_2\_Pristine

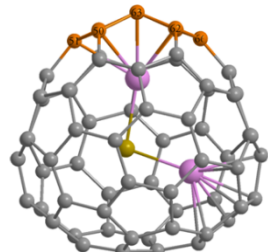

Isomer\_2\_Optimized (0.05 kcal/mol)

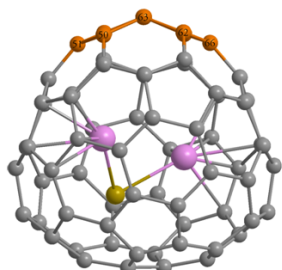

Isomer\_3\_Pristine

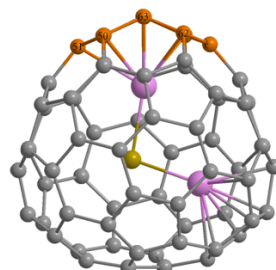

Isomer\_3\_Optimized (0.03 kcal/mol)

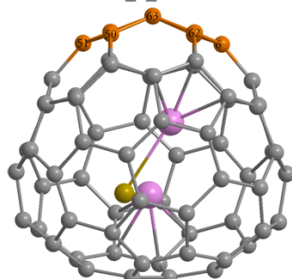

Isomer\_4\_Pristine

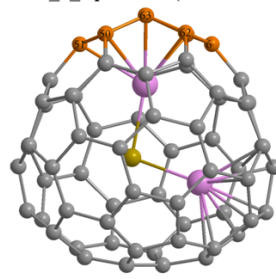

Isomer\_2\_Optimized (0.04 kcal/mol)

**Figure S3.**  $D_3(6140)$ - $C_{68}$  based isomers.

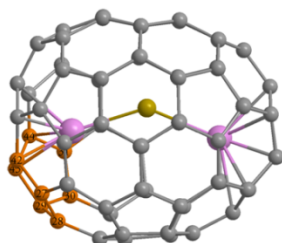

Isomer\_1\_Pristine

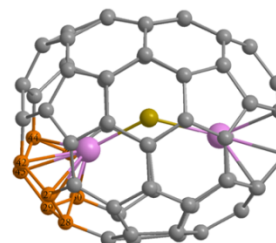

Isomer\_1\_Optimized (0.00 kcal/mol)

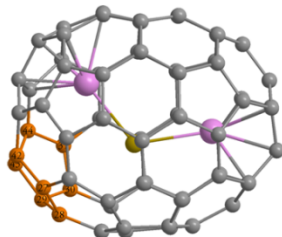

Isomer\_2\_Pristine

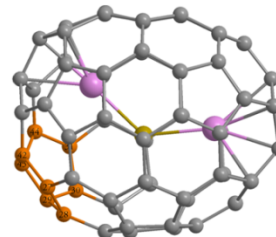

Isomer\_1\_Optimized (5.25 kcal/mol)

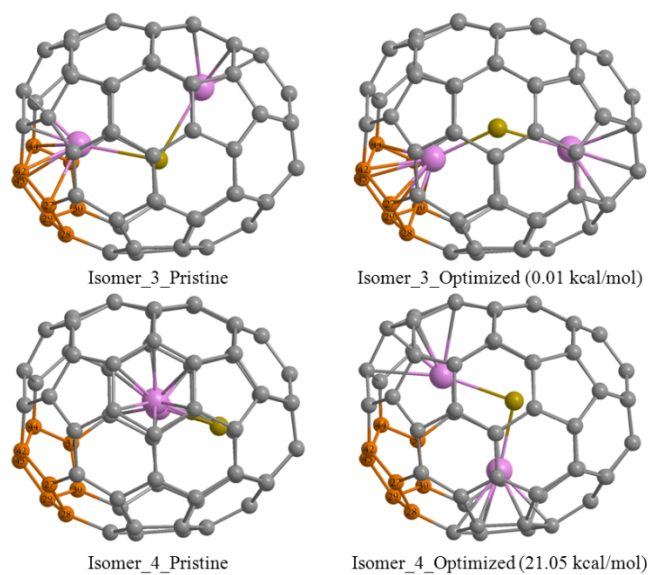

**Figure S4.**  $C_1(6039)$ - $C_{68}$  based isomers.

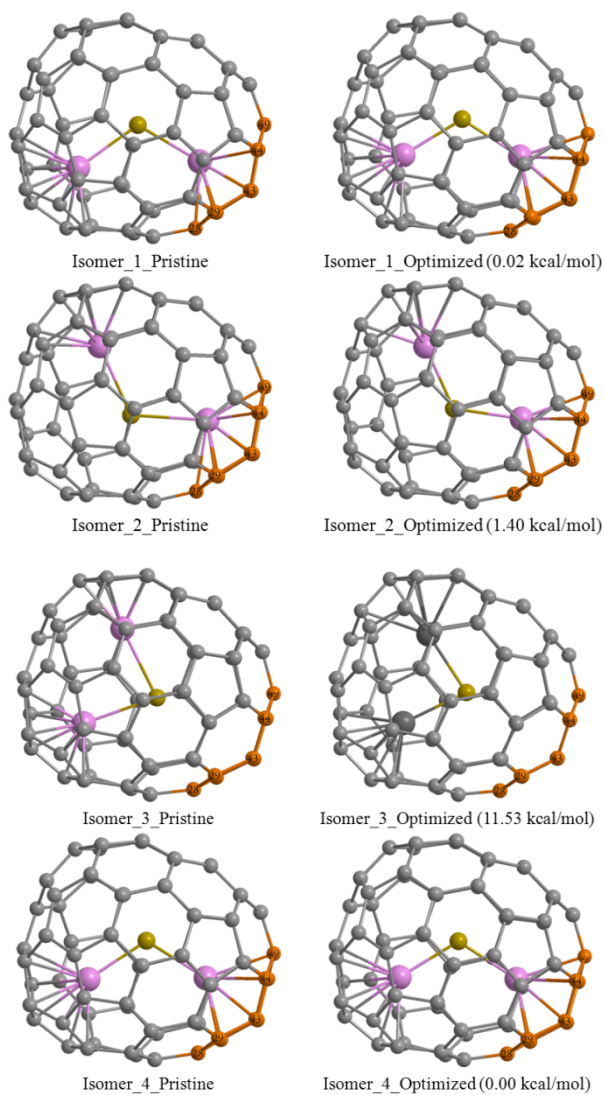

**Figure S5.**  $C_1(6079)$ - $C_{68}$  based isomers.

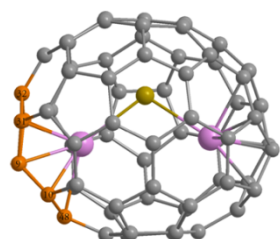

Isomer\_1\_Pristine

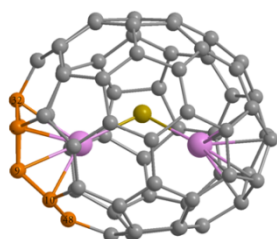

Isomer\_1\_Optimized (0.77 kcal/mol)

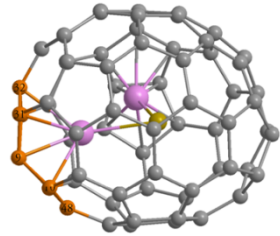

Isomer\_2\_Pristine

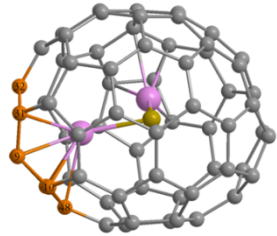

Isomer\_2\_Optimized (6.76 kcal/mol)

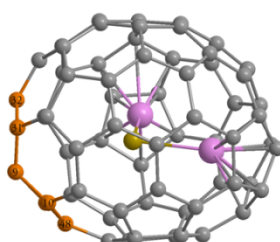

Isomer\_3\_Pristine

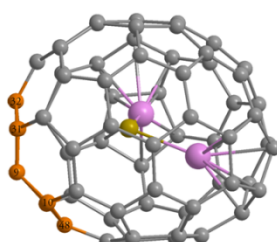

Isomer\_3\_Optimized (0.00 kcal/mol)

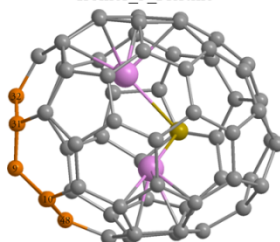

Isomer\_4\_Pristine

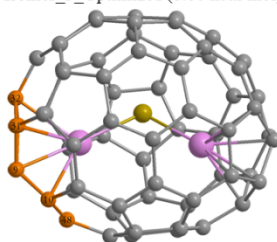

Isomer\_4\_Optimized (0.74 kcal/mol)

**Figure S6.**  $C_1(6116)$ - $C_{68}$  based isomers.

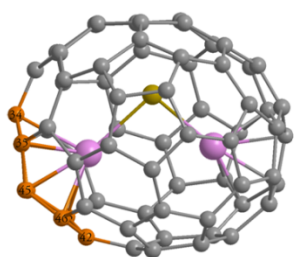

Isomer\_1\_Pristine

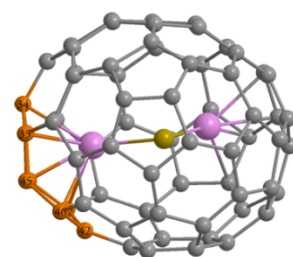

Isomer\_1\_Optimized (10.85 kcal/mol)

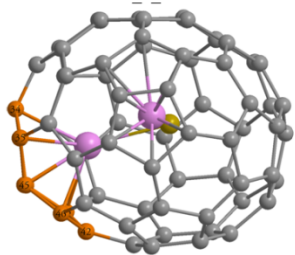

Isomer\_2\_Pristine

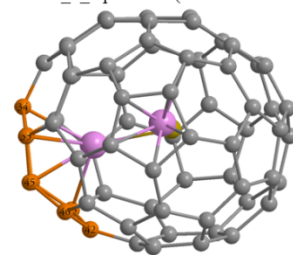

Isomer\_2\_Optimized (0.00 kcal/mol)



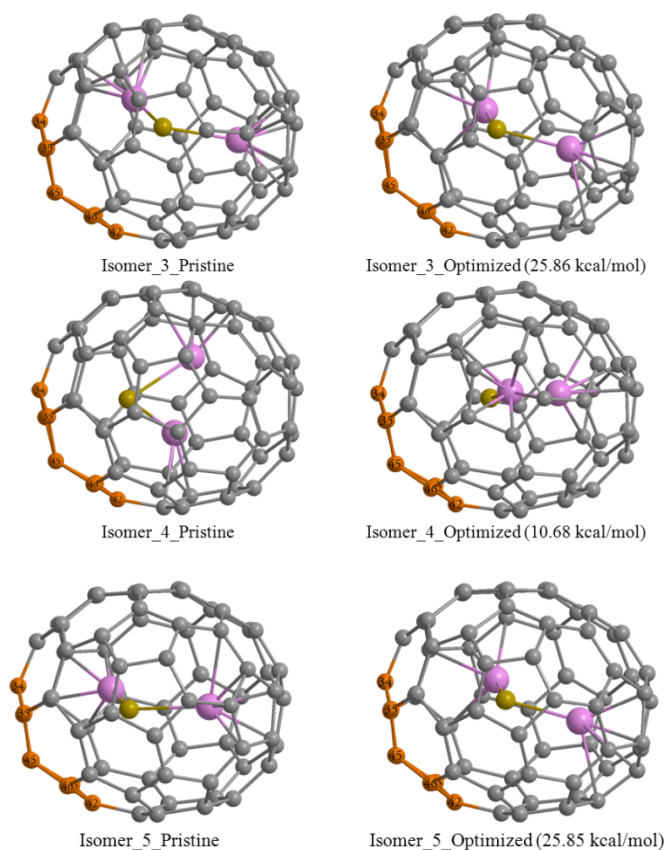

**Figure S7.**  $C_2(6328)$ - $C_{68}$  based isomers.

#### V. Spin density of the oxidized cation and reduced anion of $Sc_2S@C_{2v}(6073)-C_{68}$

To further confirm above predictions, spin densities of the oxidized and reduced  $Sc_2S@C_{68\_C_{2v}(6073)-C_{68}}$  also have been visualized. As shown in Figure S8, it is found that the spin density distribution of  $[Sc_2S@C_{68\_C_{2v}(6073)-C_{68}}]^+$  is akin to the HOMO distribution of the neutral molecule, which is mainly localized on the carbon cage. Similarly, the spin density distribution of  $[Sc_2S@C_{68\_C_{2v}(6073)-C_{68}}]^-$  is analogous to the LUMO distribution of the neutral molecule. As a consequence, it is no doubt that redox reactions mainly take place on the fullerene cage.

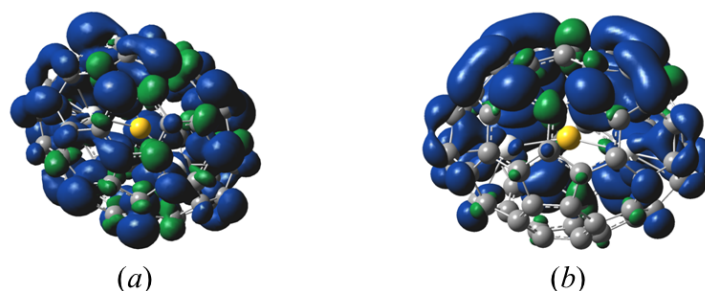

**Figure S8.** Spin densities of the (a) oxidized  $[Sc_2S@C_{68\_C_{2v}(6073)-C_{68}}]^+$  cation and reduced (b)  $[Sc_2S@C_{68\_C_{2v}(6073)-C_{68}}]^-$  anion.

#### VI. Relationship between Sc-C bond lengths and Mayer bond orders.

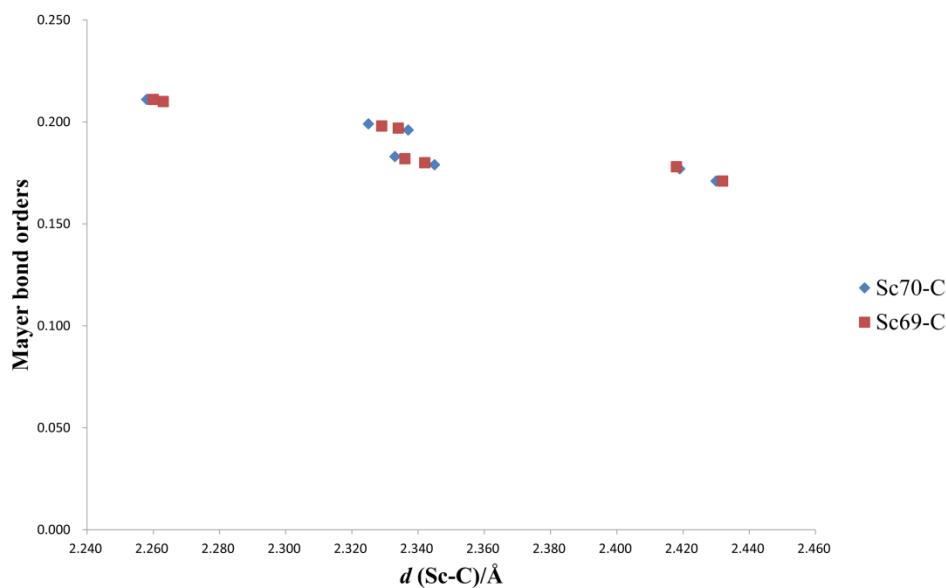

**Figure S9.** Correlation between Sc-C distances and Mayer bond order values in  $\text{Sc}_2\text{S}@C_{2v}(6073)\text{-C}_{68}$ .

## VII. A brief introduction to BCP indicators derived from Bader's QTAIM.

Bader postulated that the presence of BCP between two atoms is an essential criterion for a bond existing between them.<sup>1,2</sup> Kobayashi *et al.*<sup>3,4</sup> first applied the BCP indicators to investigate the bonding features of EMFs. Recently, a very extensive study on metal-cage and inner cluster bonding of four typical EMFs was emerged by Popov and Dunsch.<sup>5</sup> They proposed that the bonding of all types have a substantial covalent character. Nowadays, it is believed that analysis of the energy density appears more useful than the analysis of electron density and its Laplacian. Bonding between atoms can be considered as covalent if the total energy density at BCP  $H_{\text{BCP}}$  is negative.<sup>6</sup> Meanwhile, Espinosa *et al.*<sup>7</sup> suggest that the  $|V_{\text{BCP}}|/G_{\text{BCP}}$  ratio ( $V_{\text{BCP}}$  and  $G_{\text{BCP}}$  means potential energy density and kinetic energy density respectively) at BCP should be an effective indicator classify different types of interactions: the ratio less than 1 means an ionic bond, a hydrogen bonds, or a van der Waals interaction; larger than 2 represent a covalent bond between the two atoms; and if the ratio is between 1 and 2, interactions between those two atoms were defined as “intermediate”.

### References

- 1 R. F. W. Bader, *Atoms in Molecules—A Quantum Theory*, Oxford University Press, Oxford, 1990.
- 2 R. F. W. Bader, *J. Phys. Chem. A*, 1998, **102**, 7314.
- 3 K. Kobayashi and S. Nagase, *Chem. Phys. Lett.*, 1999, **302**, 312.
- 4 K. Kobayashi and S. Nagase, *Chem. Phys. Lett.*, 2002, **362**, 373.
- 5 A. A. Popov and L. Dunsch, *Chem.—Eur. J.*, 2009, **15**, 9707.
- 6 D. Cremer, and E. Kraka, *Angew. Chem.*, 1984, **96**, 612; *Angew. Chem. Int. Ed. Engl.*, 1984, **23**, 627.
- 7 E. Espinosa, I. Alkorta, J. Elguero, and E. Molins, *J. Chem. Phys.*, 2002, **117**, 5529.



### VIII. Theoretical $^{13}\text{C}$ NMR chemical shifts of $\text{Sc}_2\text{S}@C_{2v}(\text{6073})\text{-C}_{68}$ .

Through the gauge-independent atomic orbital method, the  $^{13}\text{C}$  NMR chemical shifts were evaluated at the B3LYP/6-31G(d)-Lan2dz level of theory. Theoretical chemical shift values have been calibrated to the observed  $\text{C}_{60}$  line (143.15 ppm). The  $^{13}\text{C}$  NMR chemical shifts are depicted in Table S6, respectively.

**Table S6.** Computed  $^{13}\text{C}$  NMR chemical shifts of  $\text{Sc}_2\text{S}@C_{2v}(\text{6073})\text{-C}_{68}$ .

| Chemical Shifts<br>ppm | Intensity | Chemical Shifts<br>ppm | Intensity | Chemical Shifts<br>ppm | Intensity |
|------------------------|-----------|------------------------|-----------|------------------------|-----------|
| 156.62                 | 4         | 145.94                 | 4         | 148.85                 | 2         |
| 152.76                 | 4         | 143.49                 | 4         | 147.13                 | 2         |
| 148.31                 | 4         | 142.16                 | 4         | 144.10                 | 2         |
| 148.12                 | 4         | 142.01                 | 4         | 143.37                 | 2         |
| 147.65                 | 4         | 139.73                 | 4         | 141.11                 | 2         |
| 147.43                 | 4         | 134.57                 | 4         | 140.88                 | 2         |
| 146.62                 | 4         | 152.97                 | 2         | 140.21                 | 2         |

### IX. UV-vis-NIR absorption bands of $\text{Sc}_2\text{S}@C_{2v}(\text{6073})\text{-C}_{68}$ .

**Table S2.** Computed electronic excitation energies, oscillator strengths and assignments of the most intense low-energy excitations in the UV-vis-NIR absorption spectrum of  $\text{Sc}_2\text{S}@C_{2v}(\text{6073})\text{-C}_{68}$ .

| Band<br>(nm) | Wavelength<br>(nm) | Energy<br>(eV) | $f^a$  | Leading Configurations <sup>b</sup> (%) |
|--------------|--------------------|----------------|--------|-----------------------------------------|
| 1323         | 1323.6             | 0.94           | 0.0029 | HOMO→LUMO(99)                           |
| 967          | 966.9              | 1.28           | 0.0074 | HOMO-1→LUMO(99)                         |
| 723          | 722.9              | 1.72           | 0.0506 | HOMO→LUMO+1(90)                         |
| 613          | 612.7              | 2.02           | 0.0130 | HOMO-3→LUMO(87)                         |
|              | 512.0              | 2.42           | 0.0176 | HOMO→LUMO+4(79)                         |
|              | 511.3              | 2.43           | 0.0130 | HOMO-6→LUMO(87)                         |
|              | 495.8              | 2.50           | 0.0036 | HOMO-3→LUMO+1(86)                       |
|              | 477.5              | 2.60           | 0.0102 | HOMO-4→LUMO+1(57)                       |
| 509          | 475.7              | 2.61           | 0.0034 | HOMO-9→LUMO(92)                         |
|              | 456.3              | 2.72           | 0.0036 | HOMO-2→LUMO+4(76)                       |
|              | 432.2              | 2.87           | 0.0053 | HOMO→LUMO+6(40)                         |
|              | 414                |                |        | HOMO→LUMO+7(22)                         |
| 414          | 414.7              | 2.99           | 0.0166 | HOMO-11→LUMO(54)                        |
|              | 414.3              | 2.99           | 0.0033 | HOMO-4→LUMO+2(29) HOMO-1→LUMO+5(51)     |

<sup>a</sup> Only excitations with  $f$  (oscillator strength)  $> 0.0015$  are listed. <sup>b</sup> Contributions of less than 10% are omitted.

### X. Cartesian coordinates of $\text{Sc}_2\text{S}@C_{2v}(\text{6073})\text{-C}_{68}$

C      -0.02553100    -0.00499500    0.12764200

|   |             |             |             |
|---|-------------|-------------|-------------|
| C | 1.37455200  | -0.00238800 | 0.11065600  |
| C | 2.11131300  | 1.23481600  | 0.10347400  |
| C | 3.24332800  | 1.05294900  | -0.77353100 |
| C | 3.76874300  | 2.13944100  | -1.52891900 |
| C | 4.21582700  | 1.87999400  | -2.86874800 |
| C | 4.07598700  | 2.87139900  | -3.89533300 |
| C | 3.69461600  | 2.18901400  | -5.11916800 |
| C | 2.73751300  | 2.77653100  | -5.99894000 |
| C | 1.73974300  | 1.93602000  | -6.57519800 |
| C | 0.36348300  | 2.38993300  | -6.66424600 |
| C | -0.48471500 | 1.27037200  | -6.37552100 |
| C | -1.67630500 | 1.43357600  | -5.59070000 |
| C | -2.07050400 | 0.36512900  | -4.73707600 |
| C | -2.62774800 | 0.62081900  | -3.43059300 |
| C | -2.23106200 | -0.47008900 | -2.57760200 |
| C | -1.86681200 | -0.24377000 | -1.24478100 |
| C | -0.76140200 | -0.95868100 | -0.66108900 |
| C | -0.72797100 | 1.27619400  | 0.10862700  |
| C | -1.86933800 | 1.12845000  | -0.74134500 |
| C | -2.34644400 | 2.21182700  | -1.53209700 |
| C | -2.73906200 | 1.95029800  | -2.93486200 |
| C | -2.59814500 | 3.00266100  | -3.88217100 |
| C | -2.04165000 | 2.74961300  | -5.18974100 |
| C | -1.26906400 | 3.89577800  | -5.60858100 |
| C | -0.01972000 | 3.71754800  | -6.31419900 |
| C | 1.04468100  | 4.67159600  | -6.03972300 |
| C | 2.38221000  | 4.16285200  | -5.76293300 |
| C | 2.92565600  | 4.91819000  | -4.64034200 |
| C | 3.62920700  | 4.19132900  | -3.59344100 |
| C | 3.26756900  | 4.48359400  | -2.22399500 |
| C | 3.27210000  | 3.43886400  | -1.22520700 |
| C | 2.14051300  | 3.61742700  | -0.34691400 |
| C | 1.45272800  | 2.49337600  | 0.19071300  |
| C | -0.02662500 | 2.51198800  | 0.19555700  |
| C | -0.70052200 | 3.64640000  | -0.33906000 |
| C | -1.84128100 | 3.49847600  | -1.19042800 |
| C | -1.80863900 | 4.59020800  | -2.16190400 |
| C | -2.17324000 | 4.32045000  | -3.48650300 |
| C | -1.40173200 | 4.90419900  | -4.57872000 |
| C | -0.38238000 | 5.85921800  | -4.33140000 |
| C | 0.81737000  | 5.80799500  | -5.16704600 |
| C | 1.97194400  | 5.96115500  | -4.30843000 |
| C | 1.49509900  | 6.10690000  | -2.93160400 |
| C | 2.16200600  | 5.36755000  | -1.92011200 |

|    |             |             |             |
|----|-------------|-------------|-------------|
| C  | 1.43175500  | 4.78795300  | -0.79707300 |
| C  | 0.03226000  | 4.82838800  | -0.78860500 |
| C  | -0.68449500 | 5.44356800  | -1.87540100 |
| C  | 0.03397800  | 6.07634500  | -2.94797500 |
| C  | 2.08629200  | -0.96907400 | -0.71845000 |
| C  | 3.21179500  | -0.28469200 | -1.31888300 |
| C  | 3.57197200  | -0.52148100 | -2.69893600 |
| C  | 4.04851000  | 0.58472100  | -3.46141300 |
| C  | 3.67669500  | 0.77985800  | -4.85129600 |
| C  | 2.70265800  | -0.06684900 | -5.45920100 |
| C  | 1.72304600  | 0.52672800  | -6.30875900 |
| C  | 0.33603800  | 0.10298300  | -6.23206900 |
| C  | -0.07549300 | -0.99512500 | -5.42122100 |
| C  | -1.32468000 | -0.87193800 | -4.70314000 |
| C  | -1.47758400 | -1.43151000 | -3.37684000 |
| C  | -0.48075900 | -2.25535100 | -2.79291400 |
| C  | -0.06283400 | -1.95659900 | -1.42473100 |
| C  | 1.39685200  | -2.00959500 | -1.39305900 |
| C  | 1.86997000  | -2.38974000 | -2.72429500 |
| C  | 2.84523200  | -1.56300600 | -3.41011600 |
| C  | 2.31643300  | -1.26224800 | -4.73470100 |
| C  | 0.96708500  | -1.80882800 | -4.81319800 |
| C  | 0.71665500  | -2.54132300 | -3.58510600 |
| Sc | 0.88502600  | -0.36931500 | -2.98370900 |
| Sc | 0.95694000  | 4.00925500  | -3.80025000 |
| S  | 0.56455800  | 1.90905500  | -2.94912900 |
